# Supplementary material for: Impact of Aquatic Exercise on Respiratory Outcomes and Functional Activities in Children with Neuromuscular Disorders: Findings from an Open-Label and Prospective Preliminary Pilot Study
Source: Brain Sci. 2020 Jul 17;10(7):458. doi: 10.3390/brainsci10070458 (PMC7407397; doi:10.3390/brainsci10070458)
Supplement: Supplementary file 1 [file brainsci-10-00458-s001.pdf]

**Supplementary Material.**

**Table S1.** Intervention Program.

| Aquatic Therapy Goals                                                 | Treatment Phase | Content                                                                                                                                                                                                                                                                                                                                                                                                                                                                                                                                                                                                              | Health Domain                                  | Duration |
|-----------------------------------------------------------------------|-----------------|----------------------------------------------------------------------------------------------------------------------------------------------------------------------------------------------------------------------------------------------------------------------------------------------------------------------------------------------------------------------------------------------------------------------------------------------------------------------------------------------------------------------------------------------------------------------------------------------------------------------|------------------------------------------------|----------|
| Mental adjustment + Development of water skills and swimming patterns | Initial phase   | <p>Activities that are part of the entrance ritual, are carried out, adjustment to the physical and psychological aquatic environment.</p> <p>Autonomous movement in the environment is encouraged, in dorsal and/or ventral flotation.</p> <p>Free movement</p> <ul style="list-style-type: none"> <li>▪ With variations in assistance;</li> <li>▪ Flotation aids</li> <li>▪ Control or handling by the therapist</li> </ul>                                                                                                                                                                                        | Functions and Structure Activity Participation | 10'      |
| Rotational axis WST- Halliwick                                        | Central phase   | <p>Rotational axis control is worked on; transversal, sagittal, longitudinal:</p> <ul style="list-style-type: none"> <li>▪ Flotation aids</li> <li>▪ Handling or assistance provided by therapist</li> <li>▪ Total patient autonomy</li> </ul> <p>Loading exercises are performed, according to the motor skills and specific goals;</p> <ul style="list-style-type: none"> <li>▪ sitting</li> <li>▪ standing</li> <li>▪ all fours</li> <li>▪ kneeling</li> </ul>                                                                                                                                                    | Functions and Structure Activity               | 10'      |
| Loading activities + specific mobility and motor skills work          | Central phase   | <p>Body weight (%) at different levels of immersion.</p> <p>- Xiphoid Appendix (30%)</p> <p>- Pelvis (60%)</p> <p>Activity that involves balance control and proprioception, with increased difficulty (using obstacles, different heights, materials that make activity difficult and single leg standing)</p> <p>This includes activities involving;</p> <ul style="list-style-type: none"> <li>▪ Double tasking</li> <li>▪ Coordination UL-LL</li> <li>▪ Cognitive-motor</li> <li>▪ Dissociation of shoulder and pelvic girdles</li> <li>▪ Flexibility</li> </ul> <p>Specific activity for maintenance of ROM</p> | Functions and structure Activity               | 15'      |

|                                                   |             |                                                                                                                                                                                    |                                                         |     |
|---------------------------------------------------|-------------|------------------------------------------------------------------------------------------------------------------------------------------------------------------------------------|---------------------------------------------------------|-----|
| Mental inversion<br>+<br>Improvement of<br>apneas | Final phase | Immersion activities are carried out.<br>Variations in the level of immersion<br>depending on the capabilities and<br>control of the therapist<br>Group play, putting things away. | Functions<br>and structure<br>Activity<br>Participation | 10' |
|---------------------------------------------------|-------------|------------------------------------------------------------------------------------------------------------------------------------------------------------------------------------|---------------------------------------------------------|-----|

---

ROM: Range of motion; UL: upper limbs; LL: lower limbs; WST: Water Specific Therapy.
